# Supplementary material for: Optimization of the CoFe2O4 electronic structure using reticulated expanded graphite to accelerate non-radical activation of peroxymonosulfate for efficient antibiotic degradation in wastewater
Source: Royal Society of Chemistry journal article supplement (doi:10.1039/d4ta08058k), 2025-01-01
Supplement: d4ta08058k1.pdf [file d4ta08058k1.pdf]

1 **Optimization of CoFe<sub>2</sub>O<sub>4</sub> electronic structure by reticulate expanded graphite to**  
2 **accelerate non-radical activation of peroxymonosulfate for efficient antibiotic**  
3 **degradation in wastewater**

4 Qi Zhao <sup>a</sup>, Weiguang Li <sup>a,b,\*</sup>, Shangfeng Jiang <sup>a</sup>, Jingyi Zhang <sup>a</sup>, Longyi Lv <sup>c</sup>

5 Caihua Bai <sup>a</sup>, Xuhui Wang <sup>a,\*</sup>

6

7 <sup>a</sup> School of Environment, Harbin Institute of Technology, Harbin 150090, China

8 <sup>b</sup> State Key Laboratory of Urban Water Resource and Environment, Harbin Institute of  
9 Technology, Harbin 150090, China

10 <sup>c</sup> Tianjin Key Laboratory of Clean Energy and Pollution Control, School of Energy and  
11 Environmental Engineering, Hebei University of Technology, Tianjin 300401, China

12

13 **\*Corresponding authors:**

14 Weiguang Li

15 State Key Laboratory of Urban Water Resource and Environment, School of  
16 Environment, Harbin Institute of Technology, 73 Huanghe Road, Harbin, Heilongjiang  
17 150090, China (E-mail: hit\_lwg@126.com).

18 Xuhui Wang

19 School of Environment, Harbin Institute of Technology, 73 Huanghe Road, Harbin,  
20 Heilongjiang 150090, China (E-mail: xuhuilcg@126.com).

21

22 **Captions**

23 **Text S1.** Details of agents.

24 **Text S2.** Theoretical calculation methods.

25 **Text S3.** Effects of used  $\text{CoFe}_2\text{O}_4$ -EG after thermal activation regeneration

26 **Text S4.** TC degradation pathway.

27 **Fig. S1.** Effects of  $\text{CoFe}_2\text{O}_4$ -EG after thermal activation regeneration.

28 **Fig. S2.** Oxidative degradation pathways of TC

29 **Fig. S3.** MS/MS spectra of products detected by UHPLC-QTOF/MS.

30 **Table.S1** Possible TC degradation intermediates in the  $\text{CoFe}_2\text{O}_4$ /EG/PMS system

31

32 **Text S1.** Details of agents.

33 Expandable graphite was obtained from Nanjing Grefa Carbon Materials Co., Ltd.  
34 5,5-dimethyl-1-pyrroline-N-oxide (DMPO, AR), 2,2,6,6-Tetramethyl-4-piperidone  
35 (TEMP, AR), and sodium bicarbonate ( $\text{NaHCO}_3$ , AR) were purchased from Aladdin  
36 Chemical Reagent Co., Ltd. Peroxymonosulfate ( $\text{KHSO}_5$ , PMS, AR), methanol  
37 (MeOH, AR), ethanol (EtOH), phenol (PhOH, AR), and tetracycline (TC, AR) were  
38 obtained from Shanghai Macklin Biochemical Technology Co., Ltd. (Shanghai, China).  
39 Ferric nitrate hexahydrate ( $\text{Fe}(\text{NO}_3)_3 \cdot 9\text{H}_2\text{O}$ , AR), cobaltous nitrate hexahydrate  
40 ( $\text{Co}(\text{NO}_3)_2 \cdot 6\text{H}_2\text{O}$ ), sodium chloride (NaCl, AR), potassium chloride (KCl, AR), dibasic  
41 sodium phosphate ( $\text{Na}_2\text{HPO}_4$ , AR), sodium Bicarbonate ( $\text{NaHCO}_3$ , AR), and sodium  
42 thiosulfate ( $\text{Na}_2\text{S}_2\text{O}_3$ , AR) were purchased from Tianjin Kermel Chemical Reagent Co.,  
43 Ltd.

44 **Text S2.** Theoretical calculation methods.

45 Density function theory calculations were conducted by Vienna ab initio  
46 simulation package (VASP). The core electrons were described by the projector-  
47 augmented plane wave (PAW) [1, 2]. The Perdew-Burke-Ernzerhof (PBE) was adopted  
48 as functional with the exchange-correlation term of generalized gradient approximation  
49 (GGA) [3]. In addition, the Bader charge was calculated through the algorithm BADER  
50 CHARGE ANALYSIS [4].

51 An adsorption model consisted of a slab model ( $\text{CoFe}_2\text{O}_4$ ,  $\text{CoFe}_2\text{O}_4\text{-EG}$ ) and a  
52 molecular model of  $\text{HSO}_5^-$  covered on the slab. Two electrons were localized around  
53 atomic group  $\text{SO}_5^{\bullet-}$  to form  $\text{HSO}_5^-$  by adding two hydrogen atoms as counter ions. The  
54 cutoff energy for the plane wave basis was set at 450 eV with a  $2 \times 2 \times 1$  k-point grid  
55 for Brillouin zone sampling. A 30 Å vacuum layer was established to prevent interlayer  
56 interactions. The long-range van der Waals interactions were corrected by the DFT-D3  
57 method [5].

58 The adsorption energy ( $E_{ads}$ ) of adsorbate on the catalyst was calculated based on  
59 Equation 1 [6].

$$60 \quad E_{ads} = E_{catalyst + adsorbate} - E_{catalyst} - E_{adsorbate} \quad (3)$$

61 where  $E_{ads}$  refers to the adsorption energy, eV;  $E_{catalyst + adsorbate}$  is the total energy of  
62 catalyst slab and adsorbate, eV;  $E_{catalyst}$  means the energy of the catalyst slab, eV; and  
63  $E_{adsorbate}$  is the energy of adsorbate, eV.

64 Pseudo-first-order kinetic (Equation 2) was applied to fit the oxidation processes  
65 of TC (data for 0-60 min) and calculate the corresponding degradation rate constants  
66 ( $k$ ) [7].

$$67 \quad \ln \frac{C_t}{C_0} = -kt \quad (4)$$

68 where  $C_0$  means the concentration of TC at the start of oxidation, mg/L;  $C_t$  means  
69 the concentration of TC at a point of oxidation, mg/L;  $t$  refers to the oxidation time (0  
70  $\leq t \leq 60$ ), min.

71

72 **Text S3.** Effects of used  $\text{CoFe}_2\text{O}_4\text{-EG}$  after thermal activation regeneration

73 The used catalyst was regenerated through thermal activation at  $300^\circ\text{C}$  and  
74 compared with a standalone PMS system under identical conditions. Experimental  
75 results revealed that this method restored catalytic efficiency to over 70% of its initial  
76 level (Fig. S1), highlighting its remarkable reusability and practical applicability.

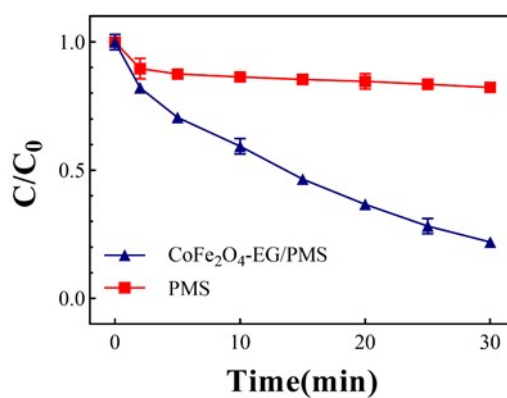

77

78 Fig. S1. Effects of used  $\text{CoFe}_2\text{O}_4\text{-EG}$  after thermal activation regeneration.

79

80 **Text S4.** TC degradation pathway.

81 To further investigate the reaction mechanism of TC, the intermediates were  
82 analyzed using UHPLC-QTOF/MS, and possible molecular structures were shown in  
83 Fig. 12. In the CoFe<sub>2</sub>O<sub>4</sub>-EG/PMS system, eleven major intermediates were detected  
84 with mass peaks at 460 (P1), 477 (P2), 379 (P3), 427 (P4), 371 (P5), 320 (P6), 302 (P7),  
85 219 (P8), 279 (P9), 228 (P10), and 150 (P11). Based on the intermediates from the  
86 degradation of TC, a degradation pathway for TC was proposed. TC molecules were  
87 attacked by SO<sub>4</sub><sup>•-</sup>, HO<sup>•</sup>, and <sup>1</sup>O<sub>2</sub>, leading to the formation of low-molecular-weight  
88 products. TC under ultimate oxidation conditions, TC molecules might be oxidized and  
89 decomposed into two intermediate products, P1 and P2. During the reaction, TC  
90 molecules lose hydroxyl (-OH) groups, forming a new intermediate product P4.  
91 Simultaneously, P4 is converted to P3 by introducing an amino (-NH<sub>2</sub>) group. P4  
92 molecules were further oxidized to form P5. P4 and P5 molecules underwent ring-  
93 opening reactions to generate new intermediate products, P6 and P7. P7 underwent  
94 catalytic oxidation to form smaller molecules P8, P9, P10, and P11. Some intermediates  
95 were ultimately mineralized to CO<sub>2</sub> and H<sub>2</sub>O.

96

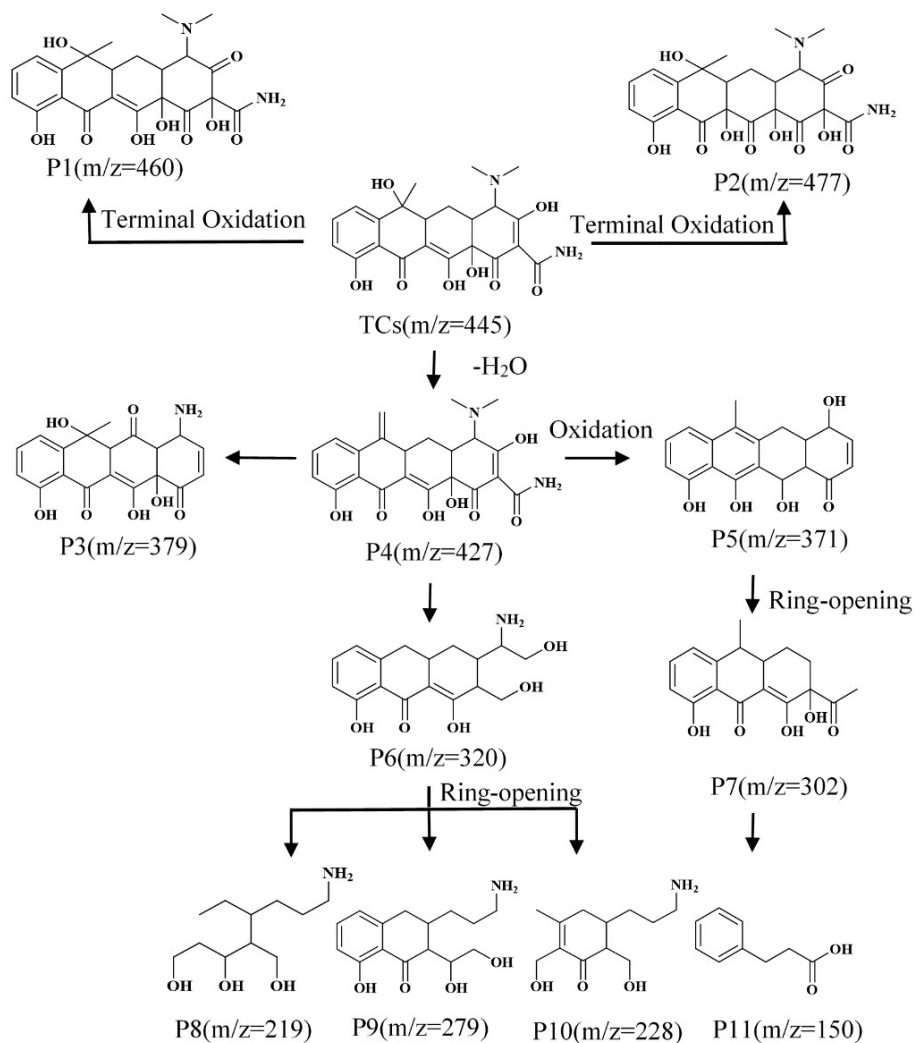

97

98

Fig.S2. Oxidative degradation pathways of TC



99 The chemical properties and secondary mass spectra of 11 intermediates are listed

100 in Table S1.

101 **Table S1.** Possible TC degradation intermediates in the CoFe<sub>2</sub>O<sub>4</sub>-EG/PMS system.

| Compound | Molecular formula                                              | m/z<br>(Molecular weight) | Molecular structure                                                                   |
|----------|----------------------------------------------------------------|---------------------------|---------------------------------------------------------------------------------------|
| P1       | C <sub>22</sub> H <sub>24</sub> N <sub>2</sub> O <sub>9</sub>  | 460.44                    | 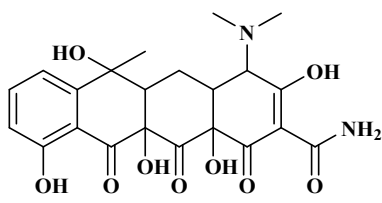    |
| P2       | C <sub>22</sub> H <sub>24</sub> N <sub>2</sub> O <sub>10</sub> | 476.44                    |    |
| P3       | C <sub>19</sub> H <sub>17</sub> NO <sub>7</sub>                | 371.35                    |  |
| P4       | C <sub>15</sub> H <sub>21</sub> NO <sub>4</sub>                | 279.34                    |  |
| P5       | C <sub>19</sub> H <sub>18</sub> O <sub>5</sub>                 | 326.35                    |  |
| P6       | C <sub>17</sub> H <sub>21</sub> NO <sub>5</sub>                | 319.36                    |   |

|     |                    |        |                                                                                       |
|-----|--------------------|--------|---------------------------------------------------------------------------------------|
| P7  | $C_{17}H_{18}O_5$  | 302.33 | 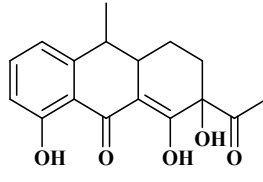   |
| P8  | $C_{11}H_{25}NO_3$ | 219.33 |    |
| P9  | $C_{15}H_{21}NO_4$ | 279.34 |    |
| P10 | $C_{12}H_{21}NO_3$ | 227.30 |   |
| P11 | $C_9H_{10}O_2$     | 150.18 |  |

102 a

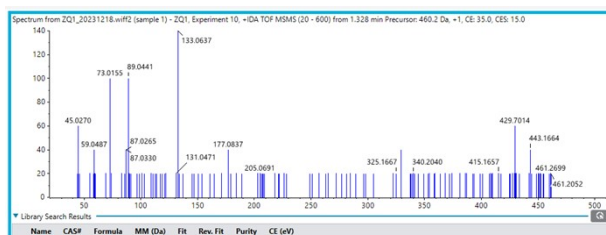

103

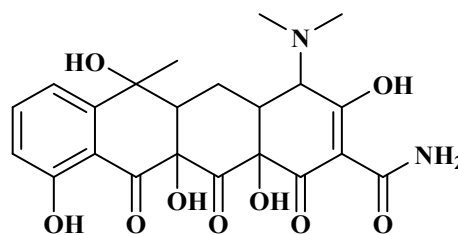

104

P1

105 b

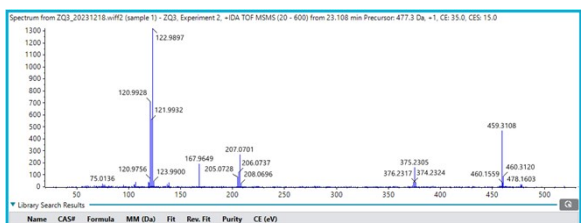

106

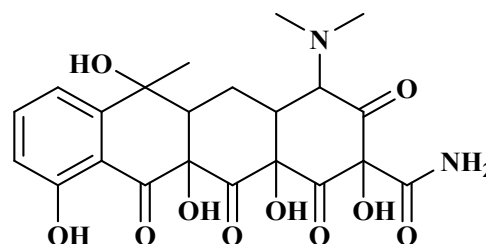

107

P2

108 **c**

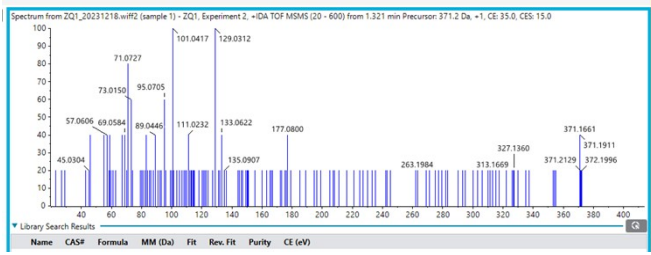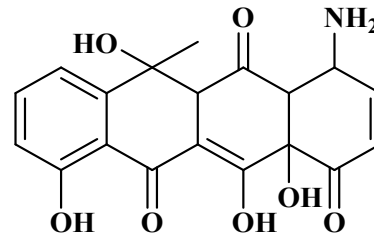

109

110

P3

111 **d**

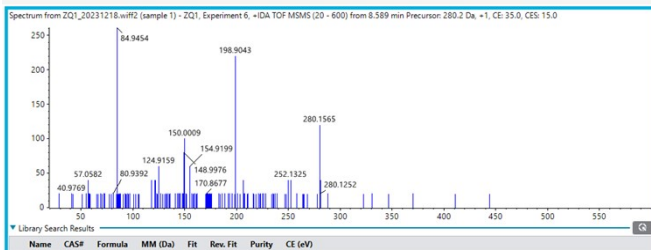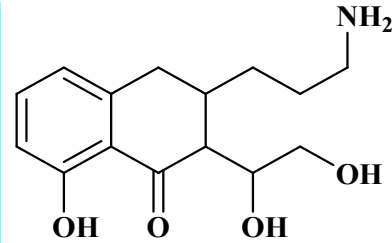

112

113

P4

114 **e**

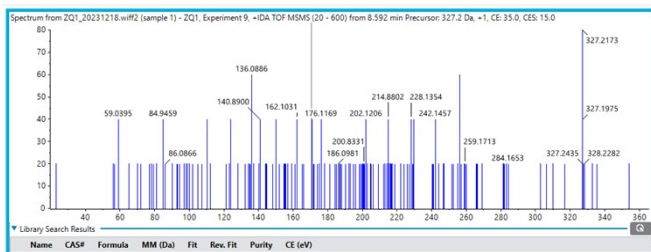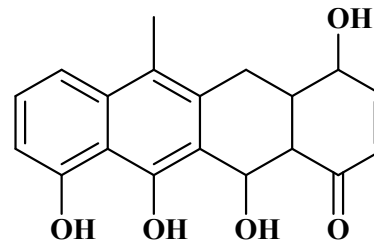

115

116

P5

117 **f**

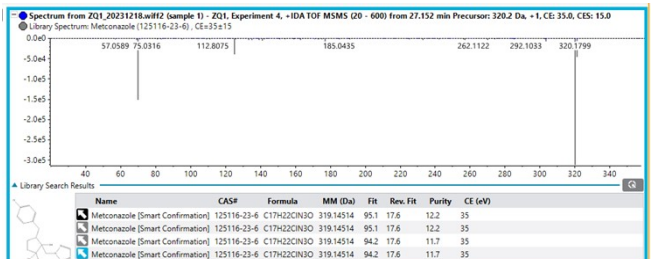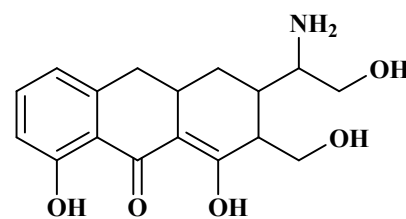

118

119

P6

120

121 **g**

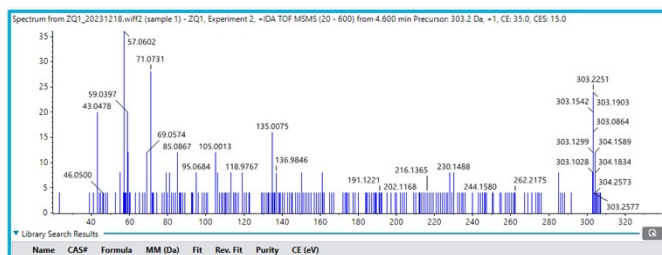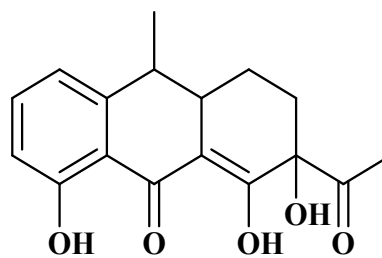

122

123

P7

124 **h**

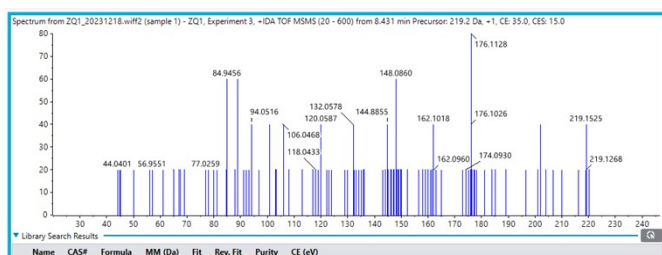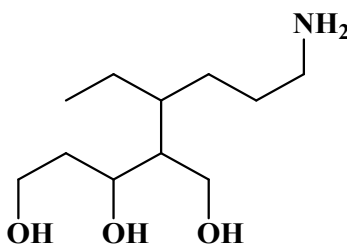

125

126

P8

127 **i**

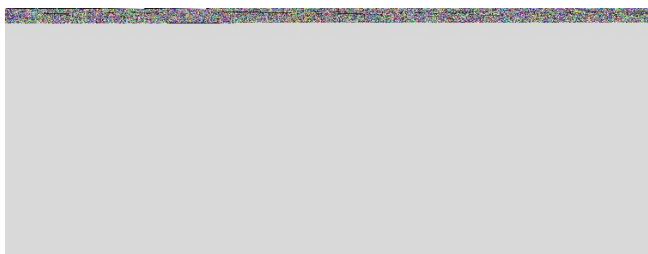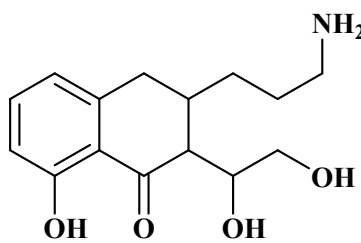

128

129

P9

130 **j**

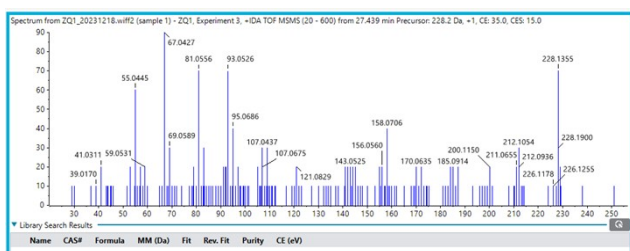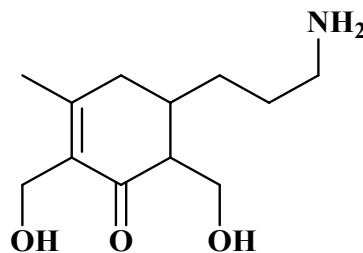

131

132

P10

133

134 k

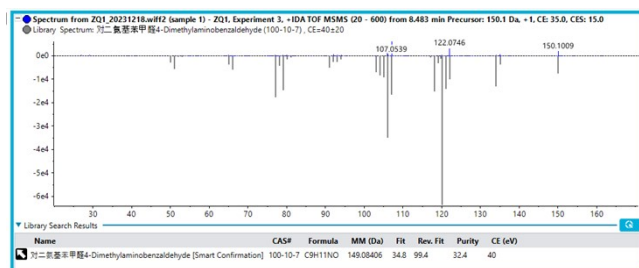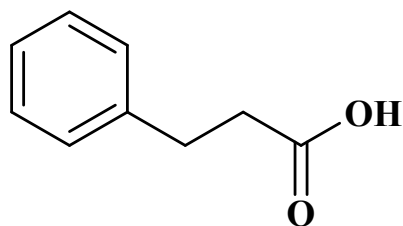

135

136

**P11**

137

Fig.S3. MS/MS spectra of products detected by UHPLC-QTOF/MS.

138

139 **Reference**

- 140 [1] Efficiency of ab-initio total energy calculations for metals and semiconductors  
141 using a plane-wave basis set.
- 142 [2] Projector augmented-wave method.
- 143 [3] G. Zhao, J. Ding, J. Ren, Q. Zhao, Q. Gao, K. Wang, L. Wei, X. Chen, F. Zhou,  
144 D.D. Dionysiou, Insight into the visible light activation of sulfite by Fe/g-C<sub>3</sub>N<sub>4</sub> with  
145 rich N vacancies for pollutant removal and sterilization: A novel approach for  
146 enhanced generation of oxysulfur radical, *Chem. Eng. J.* 438 (2022).  
147 <https://doi.org/10.1016/j.cej.2022.135663>.
- 148 [4] W. Tang, E. Sanville, G. Henkelman, A grid-based Bader analysis algorithm  
149 without lattice bias, *J. Phys. Condens. Mat.* 21(8) (2009).  
150 <https://doi.org/10.1088/0953-8984/21/8/084204>.
- 151 [5] S. Grimme, J. Antony, S. Ehrlich, H. Krieg, A consistent and accurate ab  
152 initio parametrization of density functional dispersion correction (DFT-D) for the 94  
153 elements H-Pu, *The Journal of Chemical Physics* 132(15) (2010).  
154 <https://doi.org/10.1063/1.3382344>.
- 155 [6] P. Zhang, Y. Yang, X. Duan, Y. Liu, S. Wang, Density Functional Theory  
156 Calculations for Insight into the Heterocatalyst Reactivity and Mechanism in  
157 Persulfate-Based Advanced Oxidation Reactions, *ACS Catal.* 11(17) (2021) 11129-  
158 11159. <https://doi.org/10.1021/acscatal.1c03099>.
